# Supplementary material for: The Tumor Microenvironment-Dependent Transcription Factors AHR and HIF-1α Are Dispensable for Leukemogenesis in the Eµ-TCL1 Mouse Model of Chronic Lymphocytic Leukemia
Source: MDPI journal article supplement (doi:10.3390/cancers13184518), 2021-09-08
Supplement: s1 [file s1]

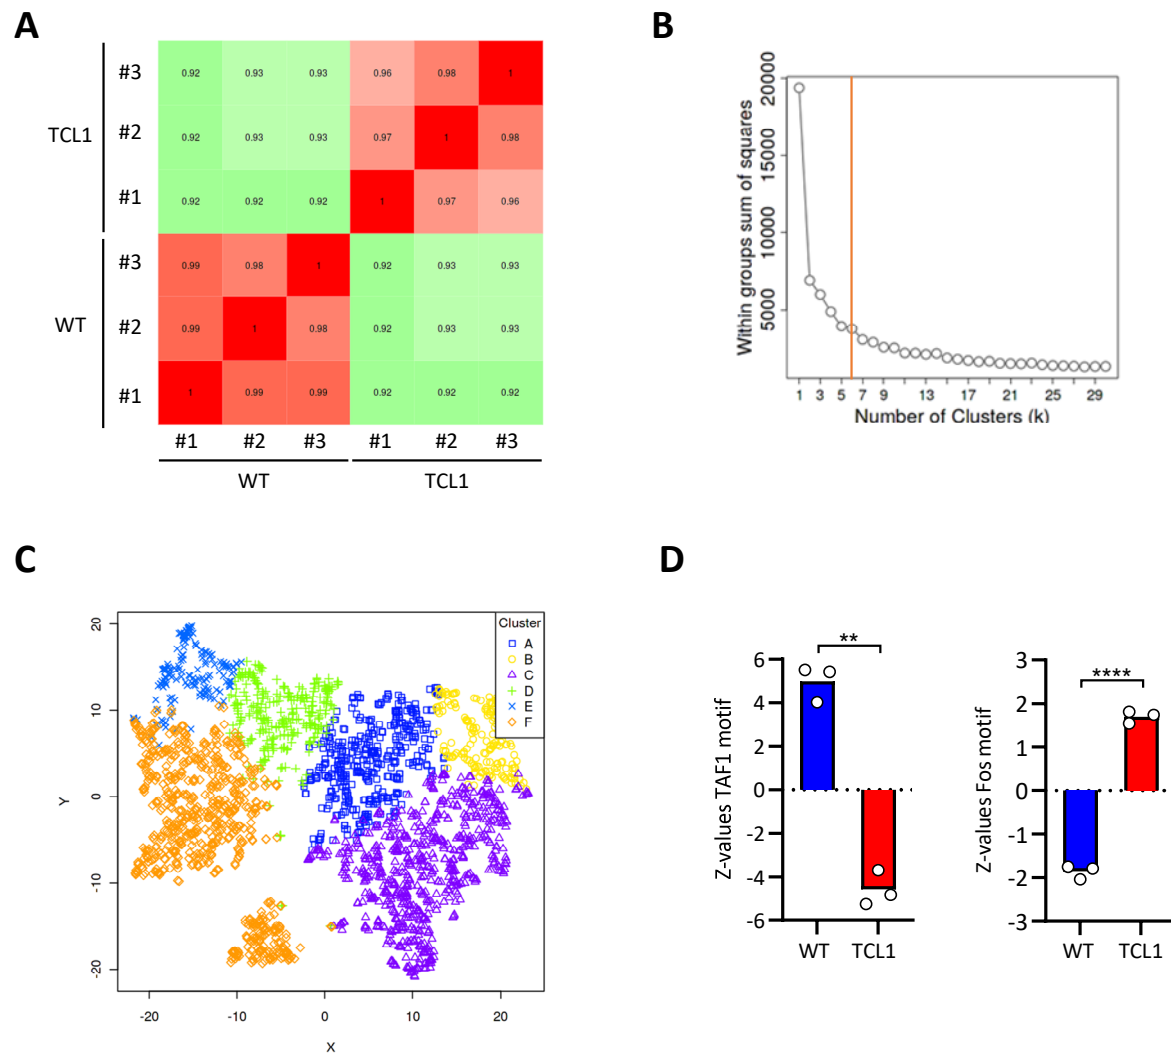

**Supplemental Figure 1:** RNA sequencing data of B cells from C57BL/6 and E $\mu$ -TCL1 mice. **(A)** Correlation matrix for all biological replicates. **(B)** Estimate of the number of clusters (K value) using the elbow method. **(C)** Mapping of the top genes to k-means clusters with the dimension reduction algorithm t-SNE. **(D)** Transcription factor activity (Z-values, ISMARA) for TAF1 and Fos motifs among WT and TCL1 B cells.

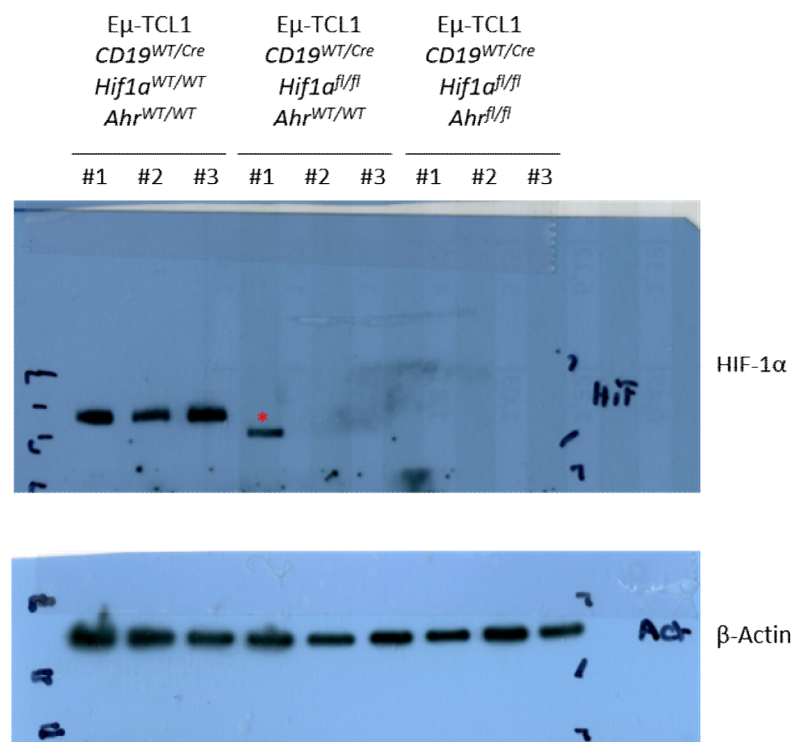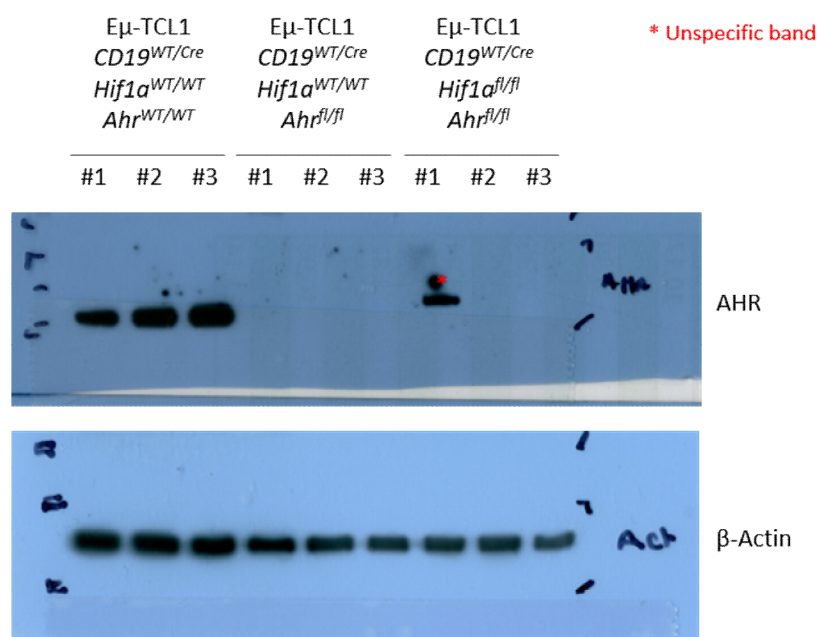

**Supplemental Figure 2:** Full gel pictures corresponding to Figure 2D, 3D, and 4F

| Gene      | logFC | FDR       |
|-----------|-------|-----------|
| Gstt1     | 6.47  | 5.487e-09 |
| Prdm16    | 9.27  | 0.0001    |
| Mcts2     | 3.69  | 0.0025    |
| Igkv12-89 | 5.61  | 0.0043    |
| Ighv1-55  | 7.14  | 0.0052    |
| Cntln     | 6.60  | 0.0081    |
| Scfd1     | 1.33  | 0.0248    |
| Mnat1     | 1.35  | 0.0248    |
| Peak1os   | -4.38 | 0.0350    |
| Gm20767   | -1.57 | 0.0350    |
| St6gal1   | -1.97 | 0.0350    |
| Cd36      | -2.40 | 0.0350    |
| Calcr1    | 4.45  | 0.0387    |
| Ctnna1    | 3.21  | 0.0471    |

**Supplemental Table 1.** Differentially expressed genes in leukemic cells from TCL1  $CD19^{Cre/WT}Hif1\alpha^{fl/fl}$  versus E $\mu$ -TCL1  $CD19^{Cre/WT}Hif1\alpha^{WT/WT}$ .

| Gene     | logFC | FDR    |
|----------|-------|--------|
| Leprotl1 | 2.33  | 0.0185 |
| Alox5ap  | -2.65 | 0.0185 |
| Prdm16   | 5.22  | 0.0265 |
| Icos     | -4.30 | 0.0342 |

**Supplemental Table 2.** Differentially expressed genes in leukemic cells from TCL1  $CD19^{Cre/WT}Ahr^{fl/fl}$  versus E $\mu$ -TCL1  $CD19^{Cre/WT}Ahr^{WT/WT}$ .

| Gene | logFC | FDR |
|------|-------|-----|
| none |       |     |

**Supplemental Table 3.** Differentially expressed genes in leukemic cells from TCL1  $CD19^{Cre/WT}Ahr^{fl/fl}Hif1\alpha^{fl/fl}$  versus E $\mu$ -TCL1  $CD19^{Cre/WT}Ahr^{WT/WT}Hif1\alpha^{WT/WT}$ .
